# Supplementary material for: CRISPR/Cas9-loxP-Mediated Gene Editing as a Novel Site-Specific Genetic Manipulation Tool
Source: PubMed Central journal article supplement — Mol Ther Nucleic Acids. 2017 Apr 25;7:378–86. doi: 10.1016/j.omtn.2017.04.018 (PMC5429228; doi:10.1016/j.omtn.2017.04.018), 2017-04-25
Supplement: mmc1.pdf [file mmc1.pdf]

OMTN, Volume 7

## Supplemental Information

### **CRISPR/Cas9-*loxP*-Mediated Gene Editing as a Novel Site-Specific Genetic Manipulation Tool**

**Fayu Yang, Changbao Liu, Ding Chen, Mengjun Tu, Haihua Xie, Huihui Sun, Xianglian Ge, Lianchao Tang, Jin Li, Jiayong Zheng, Zongming Song, Jia Qu, and Feng Gu**

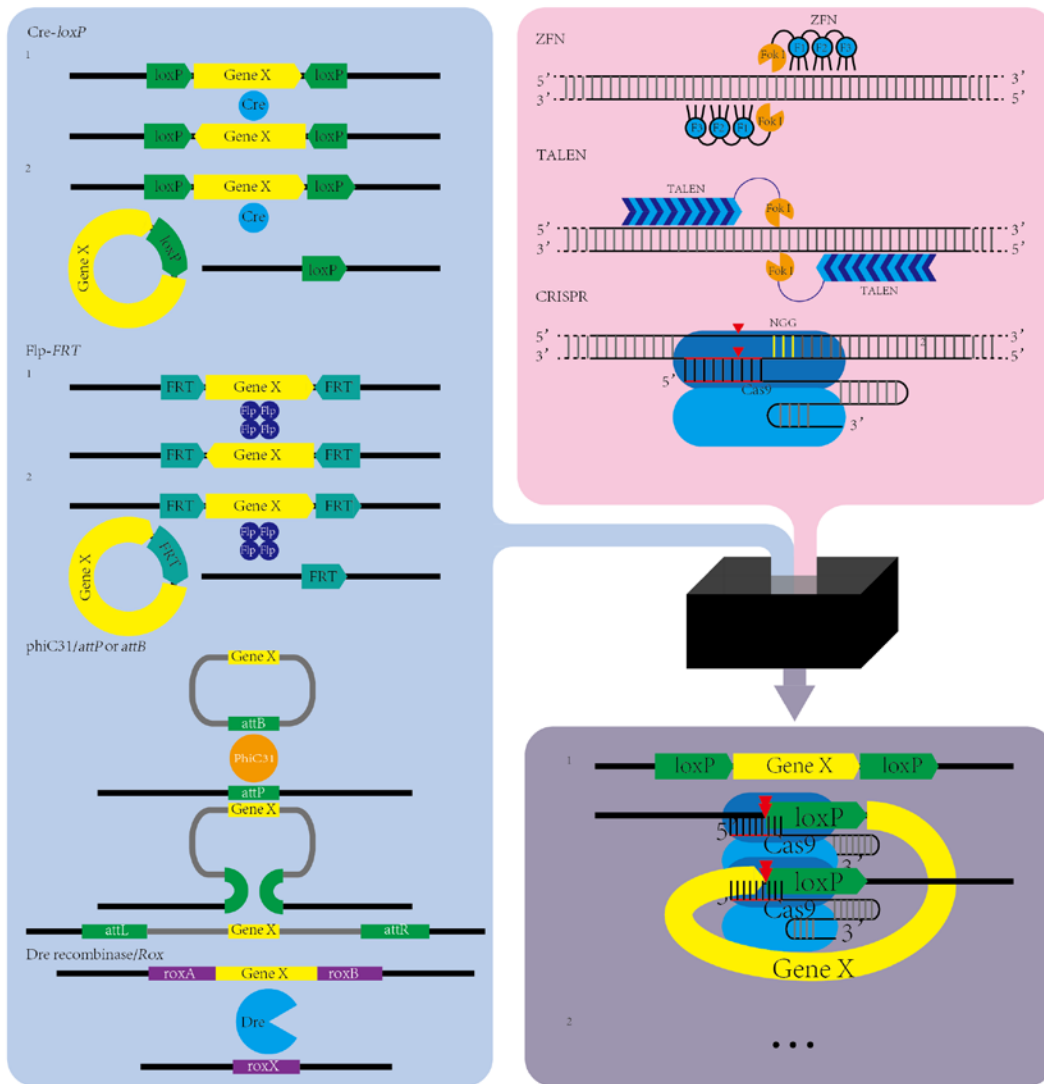

**Figure S1. Schematic of the combination of CRISPR/Cas9 and traditional site-specific genetic manipulation tools.**

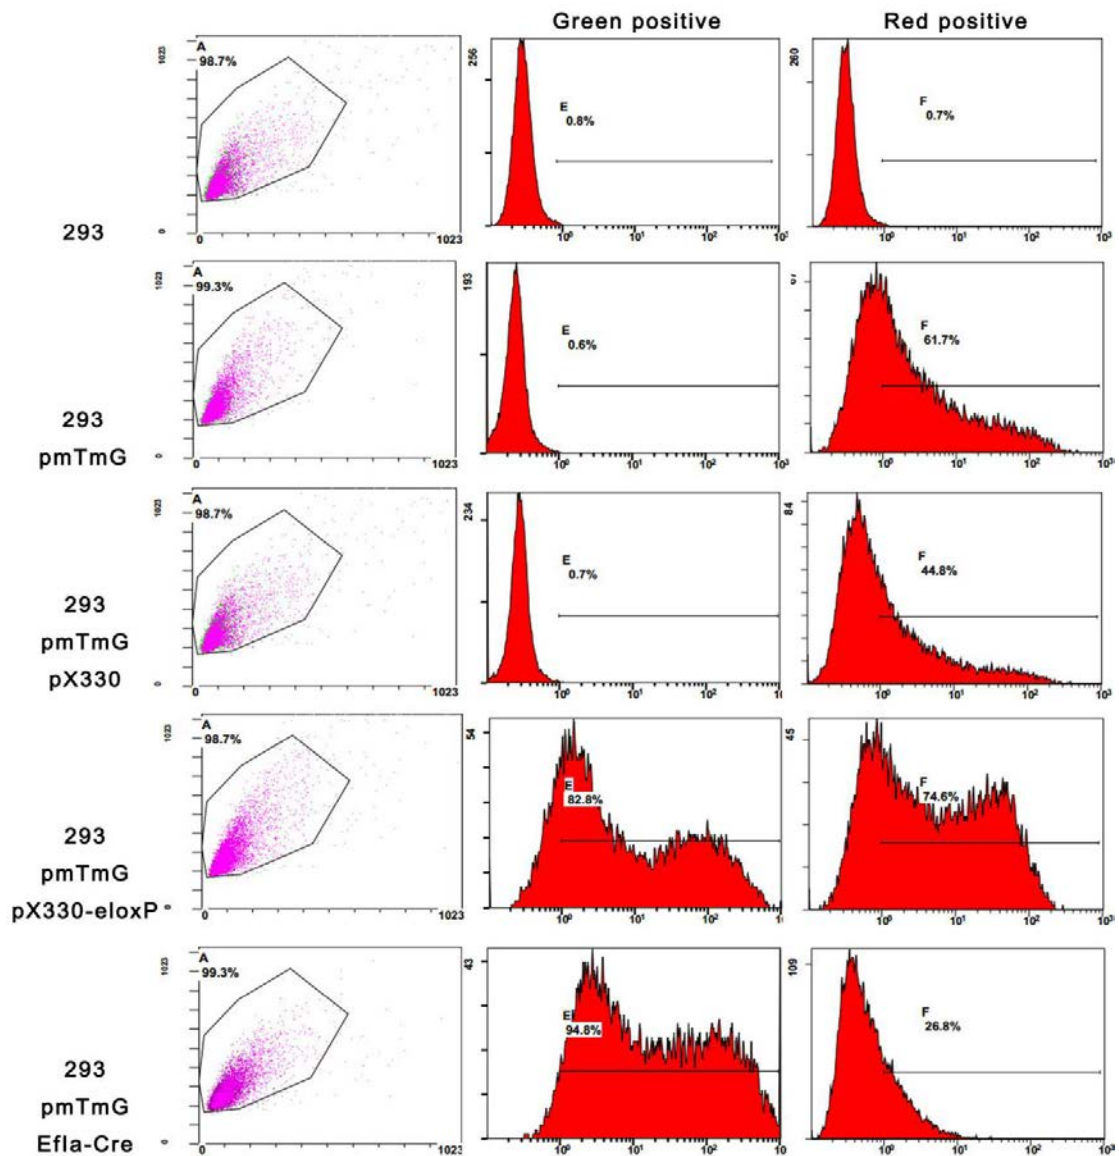

**Figure S2. Performance of CRISPR/SpCas9-e/oxP mediated site-specific genome editing examined with flow cytometry (FCM)**

HEK-293 cells were co-transfected with plasmids (pmTmG and CRISPR/SpCas9-e/oxP, 0.75ug each) and flow cytometry were performed at 60h post transfection (Red indicates *mT*; Green indicates *mG*).

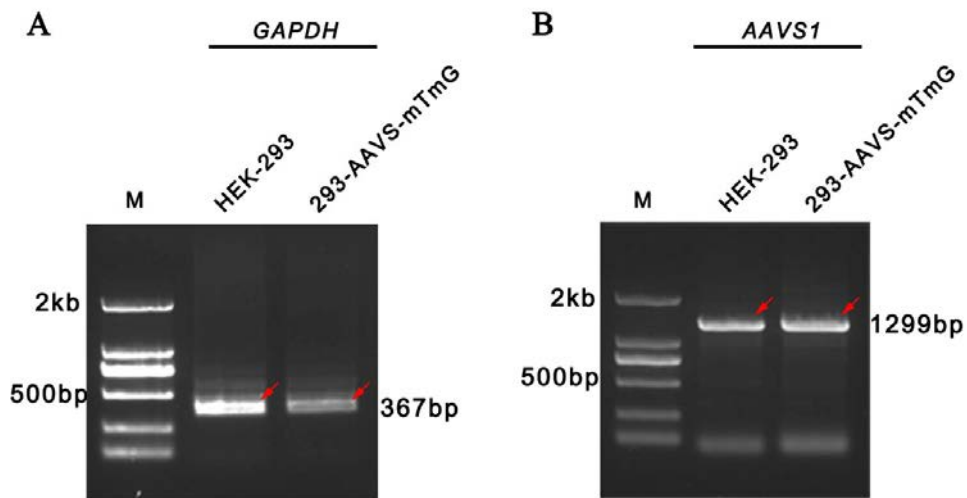

**Figure S3. Genotyping of 293-AAVS-mTmG at AAVS1 locus.**

A. PCR products of *GAPDH* gene as control (Primers: F4/R4).

B. Genotyping of the *AAVS1* gene in 293-AAVS-mTmG and parental cells (Primers: F5/R5). The unlabelled bands are the primer dimer.

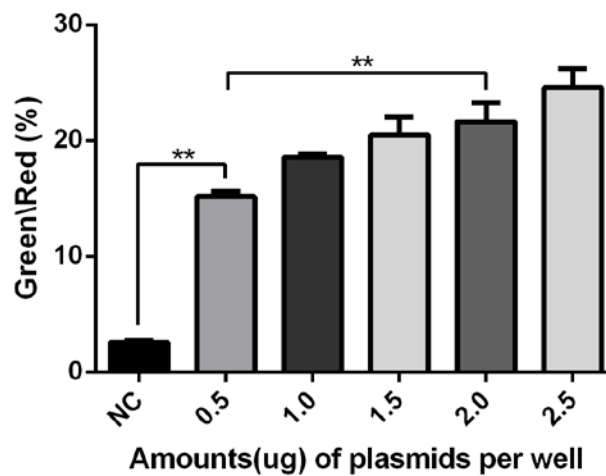

**Figure S4. Optimization of transfection conditions of CRISPR/SpCas9 -*eIoxP* plasmid to inactivate *mT*.**

293-AAVS-mTmG cells were transfected with different amounts of CRISPR/SpCas9-*eIoxP* plasmid. The cells were saturated with 2.0 mg of CRISPR/SpCas9-*eIoxP* plasmids.

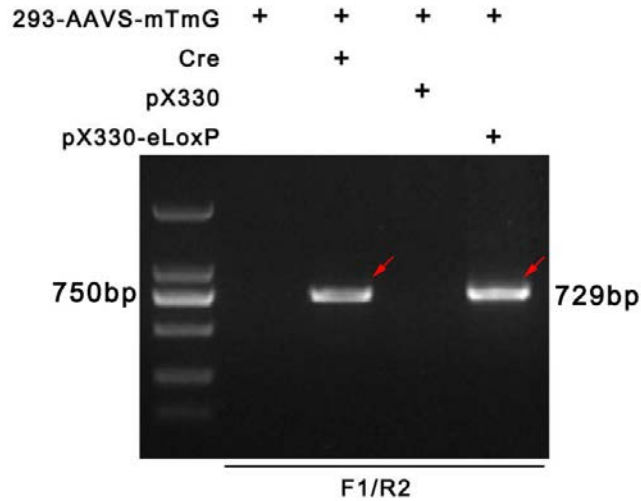

**Figure S5. Genotyping of CRISPR/SpCas9-*e/loxP* system mediated excision at human *AAVS1* locus.**

CRISPR/SpCas9-*e/loxP* mediated excision of mTomato between two *loxP* sites in 293-AAVS-mTmG. Excision bands were detected by PCR (Primers: F1/R2).

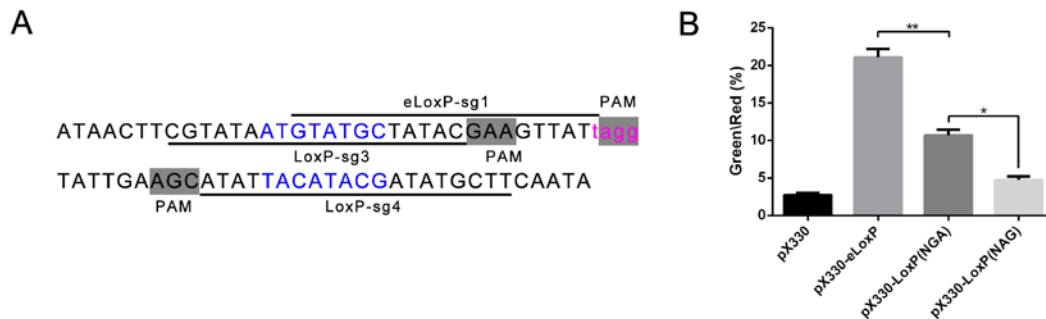

**Figure S6. Non-canonical PAM for CRISPR/SpCas9-*loxP* to inactivate *mT*.**

A. Targeting sequence and corresponding PAMs for CRISPR /SpCas9.

B. NGA or NAG PAM and the results showed that CRISPR/SpCas9-*loxP* with non-canonical PAM NGA but not NAG could achieve relative highly efficient excision of a specific gene between two *loxP* sites.

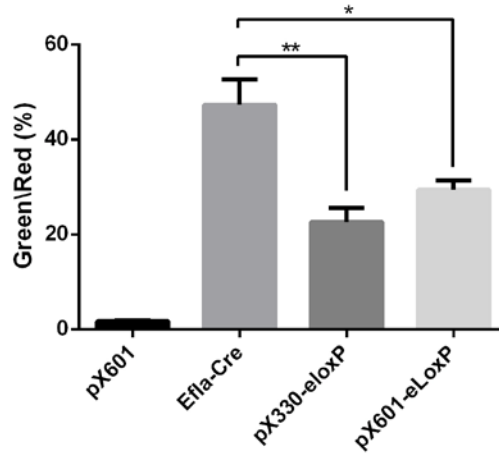

**Figure S7. Efficiency comparison of CRISPR/SaCas9-e/loxP and SpCas9-e/loxP mediated gene editing.**

pX330 and pX601 represent CRISPR /SpCas9 and CRISPR/SaCas9, respectively. Error bars are the standard deviation (SD, n=3).

| 5' GGCTTCTC- -(43bp)- -TGATCCGGAACCCCTTAATAACTTCGTATAATGTA TGCTATACGAAGTTATTAGGTCC 3'              | Efla-Cre     |
|----------------------------------------------------------------------------------------------------|--------------|
| 5' GGCTTCTC- -(43bp)- -TGATCCGGAACCCCTTAATA -(89bp)- CGTATAATGTA TGCTATACGAAGTTATTAGGTCC 3'        | +89 1/25(4%) |
| 5' GGCTTCTC- -(43bp)- -TGATCCGGAACCCCTTAATA -(44bp)- ATAACTTCGTATAATGTA TGCTATACGAAGTTATTAGGTCC 3' | +44 1/25(4%) |
| 5' GGCTTCTC- -(43bp)- -TGATCCGGAACCCCTTAATATATAACTTCGTATAATGTA TGCTATACGAAGTTATTAGGTCC 3'          | +2 1/25(4%)  |
| 5' GGCTTCTC- -(43bp)- -TGATCCGGAACCCCTTAATAACTTCGTATAATGTA TGCTATACGAAGTTATTAGGTCC 3'              | 0 6/25(24%)  |
| 5' GGCTTCTC- -(43bp)- -TGATCCGGAACCCCTTAA - TAACCTTCGTATAATGTA TGCTATACGAAGTTATTAGGTCC 3'          | -2 1/25(4%)  |
| 5' GGCTTCTC- -(43bp)- -TGATCCGGAACCCCTTAA - TAACCTTCGTATAATGTA TGCTATACGAAGTTATTAGGTCC 3'          | -3 1/25(4%)  |
| 5' GGCTTCTC- -(43bp)- -TGATCCGGAACCCCTTAAT - - CTTTCGTATAATGTA TGCTATACGAAGTTATTAGGTCC 3'          | -4 1/25(4%)  |
| 5' GGCTTCTC- -(43bp)- -TGATCCGGAACCCCTTAAT - - - TTCGTATAATGTA TGCTATACGAAGTTATTAGGTCC 3'          | -5 1/25(4%)  |
| 5' GGCTTCTC- -(43bp)- -TGATCCGGAACCCCTTAAT - - - - GTATAATGTA TGCTATACGAAGTTATTAGGTCC 3'           | -8 1/25(4%)  |
| 5' GGCTTCTC- -(43bp)- -TGATCCGGAACCCCTTAAT - - - - - ATAATGTA TGCTATACGAAGTTATTAGGTCC 3'           | -10 2/25(8%) |
| 5' GGCTTCTC- -(43bp)- -TGATCCGGAACCCCTTAA - - - - - TAATGTA TGCTATACGAAGTTATTAGGTCC 3'             | -15 1/25(4%) |
| 5' GGCTTCTC- -(43bp)- -TGATCCGGAACCCCTTAA - - - - - -TATGCTATACGAAGTTATTAGGTCC 3'                  | -17 1/25(4%) |
| 5' GGCTTCTC- -(43bp)- -TGATCCGGAAC - - - - - TGTA TGCTATACGAAGTTATTAGGTCC 3'                       | -21 1/25(4%) |
| 5' GGCTTCTC- -(43bp)- -TGATCCGGAACCC - - - - - TGCTATACGAAGTTATTAGGTCC 3'                          | -23 1/25(4%) |
| 5' GGCTTCTC- -(43bp)- -TGATCCGGAACCCCTTA - - - - - ATACGAAGTTATTAGGTCC 3'                          | -24 1/25(4%) |
| 5' GGCTTCTC- -(43bp)- -TGATCCGGAACCCCTT - - - - - TATACGAAGTTATTAGGTCC 3'                          | -25 1/25(4%) |
| 5' GGCTTCTC- -(43bp)- -TGATCCGGAACCC - - - - - CTATACGAAGTTATTAGGTCC 3'                            | -26 1/25(4%) |
| 5' GGCTTCTC- -(43bp)- -TGATCCGGAACCC - - - - - TTATTAGGTCC 3'                                      | -35 1/25(4%) |
| 5' GGCTTCTC- -(43bp)- -TGATCCGG - - - - - AAGTTATTAGGTCC 3'                                        | -37 1/25(4%) |

**Figure S8. CRISPR/ SaCas9-e/loxP mediated NHEJ pattern at the human AAVS1 locus.**

CRISPR/SpCas9-e/loxP mediated excision of mTomato between two loxP sites in 293-AAVS-mTmG. NHEJ pattern were detected by sequencing. Pink nucleotides indicate sgRNA, blue nucleotides indicate indels.

**Table S1 Target sequence**  
**Target sites for CRISPR/Cas9 System with PAMs**

| Target site ID | Target sequence<br>(5'-3') | PAM    | Strand |
|----------------|----------------------------|--------|--------|
| eLoxP-1(pX330) | GTATGCTATACGAAGTTATT       | AGG    | +      |
| eLoxP-2(pX601) | TACATTATACGAAGTTATATT      | AAGGGT | -      |
| AAVS1          | TCACCAATCCTGTCCCTAG        | TGG    | +      |
| LoxP-3(pX330)  | CGTATAGCATAACATTATACG      | NAG    | +      |
| LoxP-4(pX330)  | TTCGTATAATGTATGCTATA       | NGA    | -      |

**Oligonucleotide sequences for sgRNA architecture**

| Primer Name | Primer sequence (5'-3')    |
|-------------|----------------------------|
| eLoxP-1-F   | CACCGGTATGCTATACGAAGTTATT  |
| eLoxP-1-R   | AAACAATAACTTCGTATAGCATAACC |
| eLoxP-2-F   | CACCGTACATTATACGAAGTTATATT |
| eLoxP-2-R   | AAACAATATAACTTCGTATAATGTAC |
| AAVS1-F     | CACCGTCACCAATCCTGTCCCTAG   |
| AAVS1-R     | AAACCTAGGGACAGGATTGGTGAC   |
| LoxP-3-F    | CACCGCGTATAGCATAACATTATACG |
| LoxP-3-R    | AAACCGTATAATGTATGCTATACGC  |
| LoxP-4-F    | CACCGTTCGTATAATGTATGCTATA  |
| LoxP-4-R    | AAACTATAGCATAACATTATACGAAC |

**Table S2 Primers sequences**

**PCR primers**

| Primer Name | Primer sequence (5'-3') | Product(bp) | Annealing(°C) |
|-------------|-------------------------|-------------|---------------|
| F1          | GGGACTTCCTTTGTCCCAAATC  | 740bp       | 58            |
| R1          | GGGAAGGACAGCTTCTTGTAATC |             |               |
| F2          | CAGGCATAGAGTGTCTGCTATT  | 725bp       | 58            |
| R2          | GATGAACTTCAGGGTCAGCTT   |             |               |
| F3          | GGGCTATGAACTAATGACGGA   | 966bp       | 60            |
| R3          | GTCCAGGCCAAGTAGGTG      |             |               |
| F4          | CTGGCACCCCTATGGACACG    | 367bp       | 60            |
| R4          | GTCTTCTGGGTGGCAGTGAT    |             |               |
| F5          | ACCTCTCACTCCTTTTCATTTGG | 1299bp      | 60            |
| R5          | TGAGTTTGCCAAGCAGTCA     |             |               |
| F6          | CTCTCGTTTCTTAGGATGGCC   | 150         | 60            |
| R6          | GAAAGCAAGAGGATGGAGAGG   |             |               |

**Sequencing primers**

| Primer Name | Primer sequence (5'-3')  |
|-------------|--------------------------|
| U6-F        | GAGGGCCTATTTCCCATGATTC   |
| Jet-F       | TGAACACCATATCCATCCGGCGTA |

**Table S3 Off-target analysis for CRISPR/SpCas9-*loxP* System****PCR primers**

| Primer Name | Primer sequence (5'-3')    | Product(bp) | Annealing(°C) |
|-------------|----------------------------|-------------|---------------|
| F7          | GACAGAGAGGCACAAAGTCATA     | 305bp       | 58            |
| R7          | AGAATACTGGTCCCTGGAAATG     |             |               |
| F8          | GAGACGGAGTCTTGTTCCATAG     | 499bp       | 58            |
| R8          | GTGTTGTTAGTTGGAAGAGTCATTAG |             |               |
| F9          | GCCATGATGACTTCACCTGAT      | 455bp       | 58            |
| R9          | TTGGTTTGGGCAATACCTTCT      |             |               |
| F10         | AGCTGACTTCTCACCACAAAC      | 374bp       | 58            |
| R10         | GCAATGACACAATTGCCTAACC     |             |               |
| F11         | TGGAGATTAAGAGACAAGGGAATG   | 458bp       | 58            |
| R11         | GTAATATCACAGCTACTTGGAGAGG  |             |               |
| F12         | GGCAGAGAAGGGCAAGTAAG       | 348bp       | 58            |
| R12         | GCCACGTCAGTAGTGGTATTT      |             |               |
| F13         | GCATCAGAAAGCACAGAGACTA     | 441bp       | 58            |
| R13         | GCTTCCTTTACTCTCACCCTTTA    |             |               |
| F14         | ACAGTGGTAAAGACCAATCAGG     | 300bp       | 58            |
| R14         | CTGCTGTGTACCTATGTCAGAAG    |             |               |
| F15         | TGGAGATTAAGAGACAAGGGAATG   | 458bp       | 58            |
| R15         | GTAATATCACAGCTACTTGGAGAGG  |             |               |
| F16         | TGGTGCCTGCCTGTAATC         | 420bp       | 58            |
| R16         | CCAGTTGCCTTTGAAGTCATTC     |             |               |

**Analysis of off-target induced by CRISPR/SpCas9-*loxP* System**

| Chromosome     | Target sequence (5'-3') | PAM | Off-target |
|----------------|-------------------------|-----|------------|
| eLoxP-1(pX330) | GTATGCTATACGAAGTTATT    | AGG |            |
| Chr 1          | GTAGGGTAAGGAAGTTATT     | AGG | No         |
| Chr 3          | CTATGACATACTAAGTTATT    | AGG | No         |
| Chr 6          | GTAT ACTGTTTGAAGTTATT   | TGG | No         |
| Chr 8          | AAATGCTAACCGAAGTTATT    | TGG | No         |
| Chr 9          | AAATGCTAAAGGAAGTTATT    | TAG | No         |
| Chr 10         | AAATGCTTTAGGAAGTTATT    | CGG | No         |
| Chr 12         | AAATGCTAAAGAAGTTATT     | CAG | No         |
| Chr 13         | GTAATGTATACAAAGTTATT    | TGG | No         |
| Chr 13         | ATATTCTCTAAGAAGTTATT    | AGG | No         |
| Chr 18         | TAATGCTAAAGGAAGTTATT    | TGG | No         |



**Table S4 Off-target analysis for CRISPR/SaCas9-*loxP* System PCR primers**

| Primer Name | Primer sequence (5`-3`)   | Product(bp) | Annealing(°C) |
|-------------|---------------------------|-------------|---------------|
| F17         | GCATCACAGTCACAGCATTT      | 263bp       | 58            |
| R17         | GAAAGGGCAGACCTAGGATATAA   |             |               |
| F18         | CATTAGGCTTTATCGACCTAGTGA  | 373bp       | 58            |
| R18         | CATGTCAATTTAGGCAGGGTTT    |             |               |
| F19         | GTAGCCTCTAGCCACATGTTT     | 320bp       | 58            |
| R19         | TCACCACCTTTGGTGTTC        |             |               |
| F20         | CCTGTTCCACTCTCCCTTTATAC   | 386bp       | 58            |
| R20         | ACAGAAGAGTAGACCTATTTGTAAG |             |               |
| F21         | CCTCCTGAATAGCTGGGATTAC    | 391bp       | 58            |
| R21         | CCCTCCCTGGTTAGAAGAAAC     |             |               |
| F22         | GGCAGAATCTGAAAGTGGATACT   | 551bp       | 58            |
| R22         | GCCTCAATGAGCTCCCAAATA     |             |               |
| F23         | AACCCAATTCCCATCAACTAAATC  | 446bp       | 58            |
| R23         | AGGGAAGAGTCATTGGTAAAGTC   |             |               |
| F24         | GTGCCTGGCCAACATTTATC      | 459bp       | 58            |
| R24         | CCCACAAGAGTGGAGGATTATT    |             |               |
| F25         | CTGTTGAGCATTTAATTTCCGGTGA | 436bp       | 58            |
| R25         | TCACACATGTCTTTGGAGATTGA   |             |               |
| F26         | TCCAAGGTAGTGGCATTGATAC    | 410bp       | 58            |
| R26         | AAGAAAGGAGGGAACCTTTGATAC  |             |               |

**Analysis of off-target induced by CRISPR/SaCas9-*loxP* System**

| Chromosome             | Target sequence (5`-3`) | PAM    | Off-target |
|------------------------|-------------------------|--------|------------|
| <i>eLoxP-2</i> (pX601) | TACATTATACGAAGTTATATT   | AAGGGT |            |
| Chr 4                  | TATATTATACAAACATATATT   | AAGAAT | No         |
| Chr 4                  | TCATTATATGAAGTTCAATT    | CAGGAT | No         |
| Chr 7                  | CACTATCTACGAGGTTATATT   | AAGTGA | No         |
| Chr 7                  | ACTACTTTTGAAGTTATATT    | AAGGCC | No         |
| Chr 8                  | TTCTTTATAAGAAGATATATT   | CTGAGT | No         |
| Chr 11                 | TACAATCTATGAAGTGATATT   | TAGGAT | No         |
| Chr 13                 | ACATTATACGATGTTACATT    | ATATGA | No         |
| Chr 19                 | TAAACCCAAAGAAGTTATATT   | AAGATT | No         |
| Chr X                  | TACTTTATATAAACCTTATATT  | TGGAAT | No         |
| Chr X                  | TCACTTCAAGATGTTATATT    | AAGGGA | No         |
